# Supplementary material
Source: publisher figshare collection journal article supplement (https://acs.figshare.com/ndownloader/files/5708154)
Supplement: Supplementary file 1 [file 5708154]

# Inorganic Chemistry

including bioinorganic chemistry

Inorg. Chem., 1998, 37(15), 3667-3674, DOI: [10.1021/ic9707321](https://doi.org/10.1021/ic9707321)

## Terms & Conditions

Electronic Supporting Information files are available without a subscription to ACS Web Editions. The American Chemical Society holds a copyright ownership interest in any copyrightable Supporting Information. Files available from the ACS website may be downloaded for personal use only. Users are not otherwise permitted to reproduce, republish, redistribute, or sell any Supporting Information from the ACS website, either in whole or in part, in either machine-readable form or any other form without permission from the American Chemical Society. For permission to reproduce, republish and redistribute this material, requesters must process their own requests via the RightsLink permission system. Information about how to use the RightsLink permission system can be found at <http://pubs.acs.org/page/copyright/permissions.html>

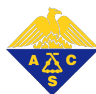

ACS Publications

MOST TRUSTED. MOST CITED. MOST READ.

Copyright © 1998 American Chemical Society

## Supporting Information.

**Figure S1.** The XAFS spectra (a) and FT's (b) (modulus and imaginary parts) of  $\text{Gd}^{3+}$  ion in the aqueous solution: experimental spectra at pH 7.0 and RT (full lines) and MS calculated spectra of the tricapped prism (dashed lines) and square antiprism (dotted line). The first (SS in the first shell), second and third (MS in the first shell) peaks are clearly visible.

**Figure S2.** The experimental (RT crystal) XAFS spectra (full lines) and MS calculated spectra (dashed lines) of  $\text{Gd}(\text{DOTA})^-$  complex (a) and  $\text{Gd}(\text{DTPA})^{2-}$  (b) complexes in the crystals. The first and second shells fitting results also shown (dotted line).

**Figure S3.** FT's (modulus and imaginary parts) of the experimental (RT crystal) XAFS spectra (full lines) and MS calculated spectra (dashed lines) of  $\text{Gd}(\text{DOTA})^-$  complex (a) and  $\text{Gd}(\text{DTPA})^{2-}$  complex (b) in the crystals. The first and second shells fitting results also shown (dotted line).

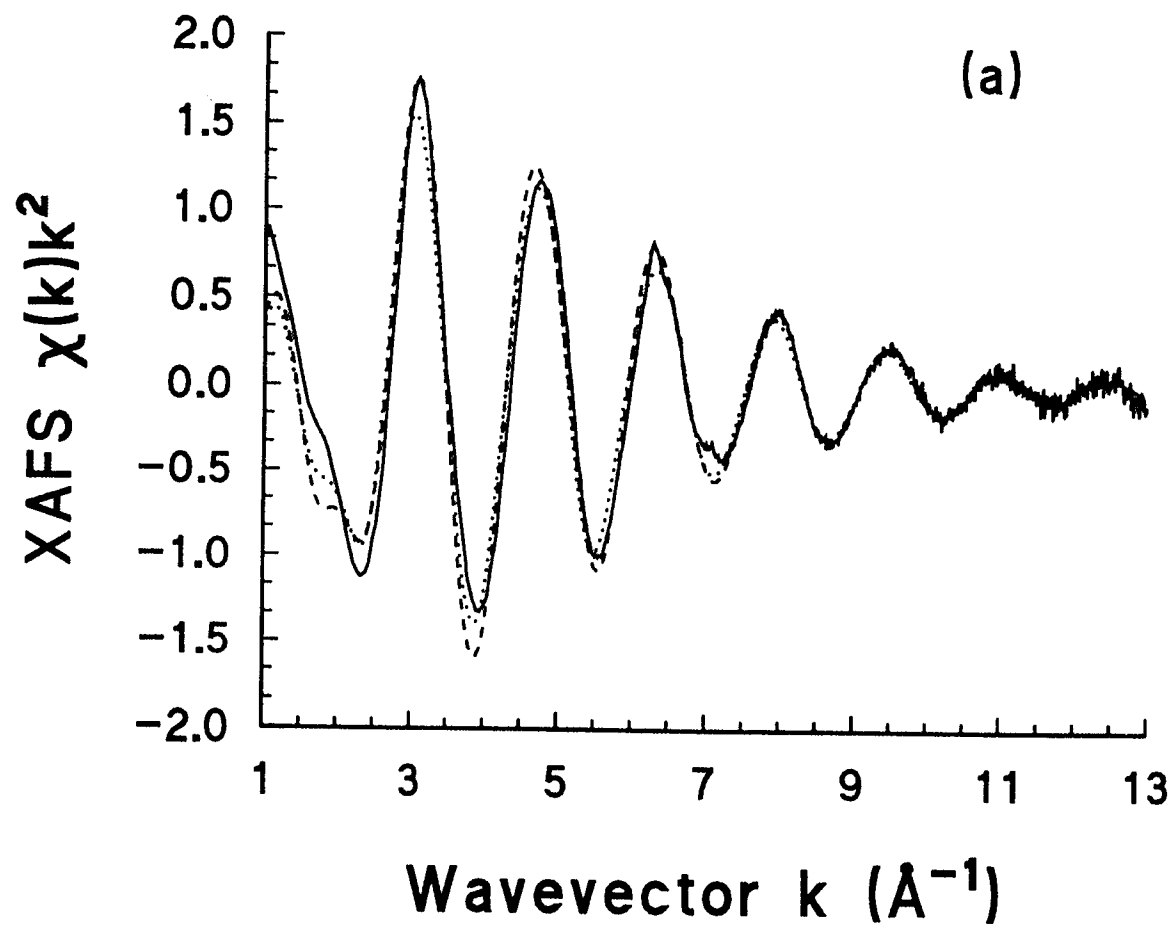

Figure S1a

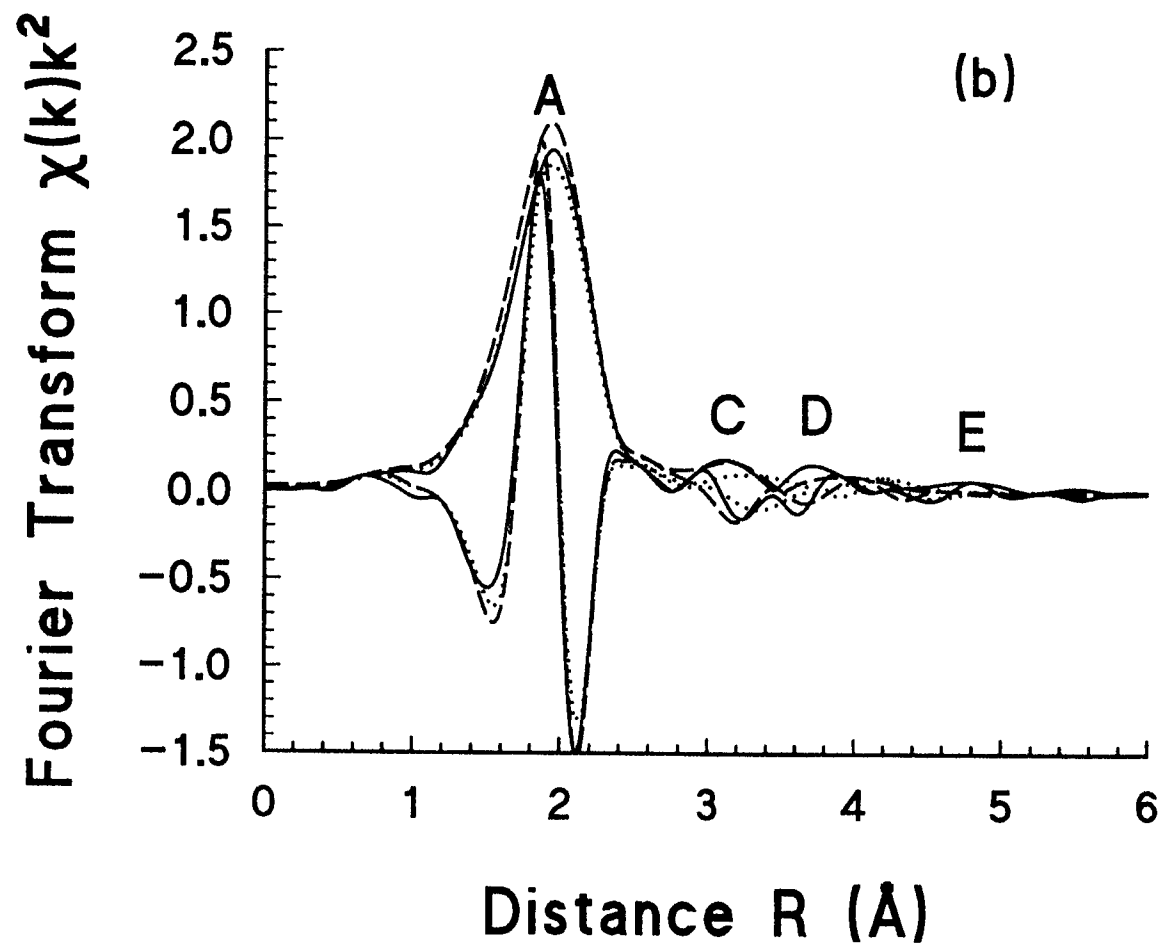

Figure S1b

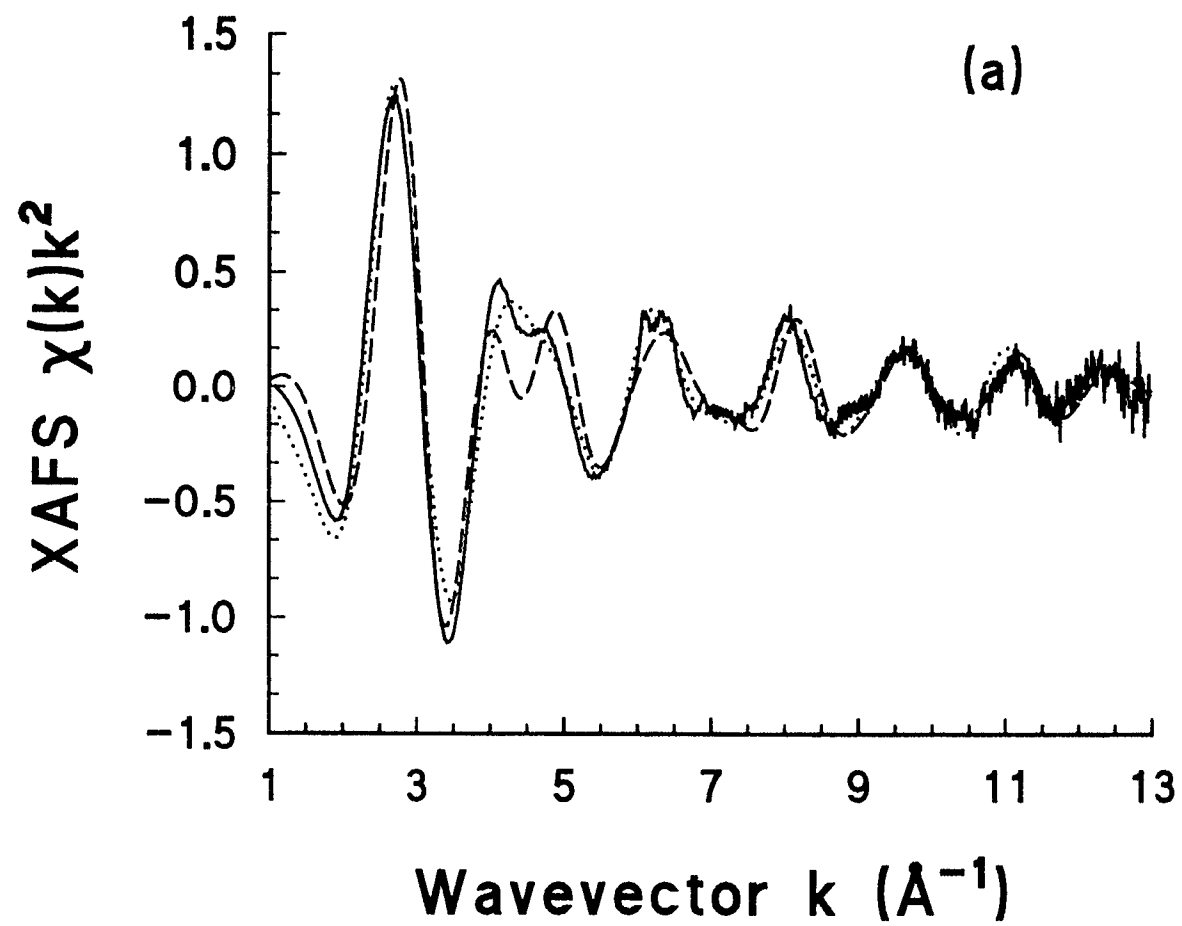

Figure S2a

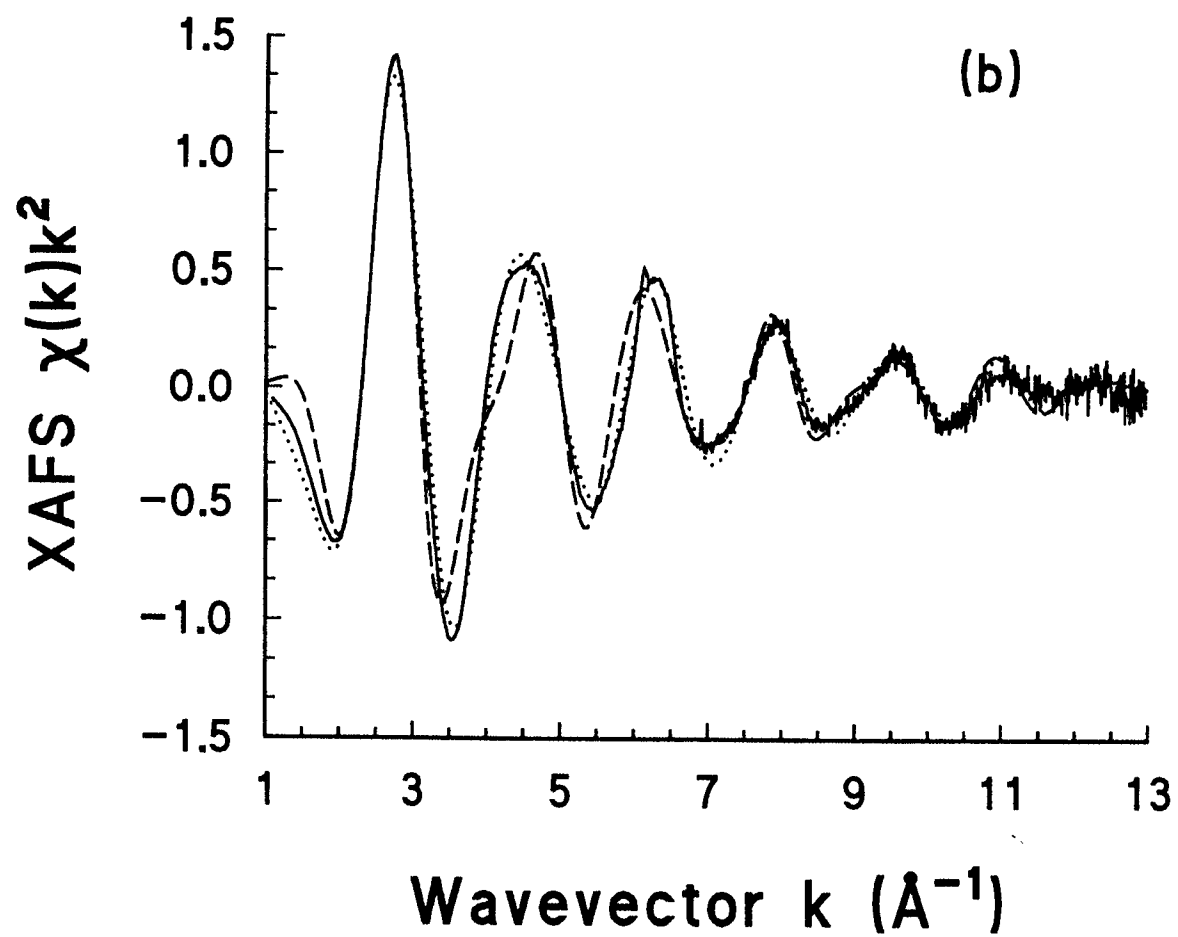

Figure S2b

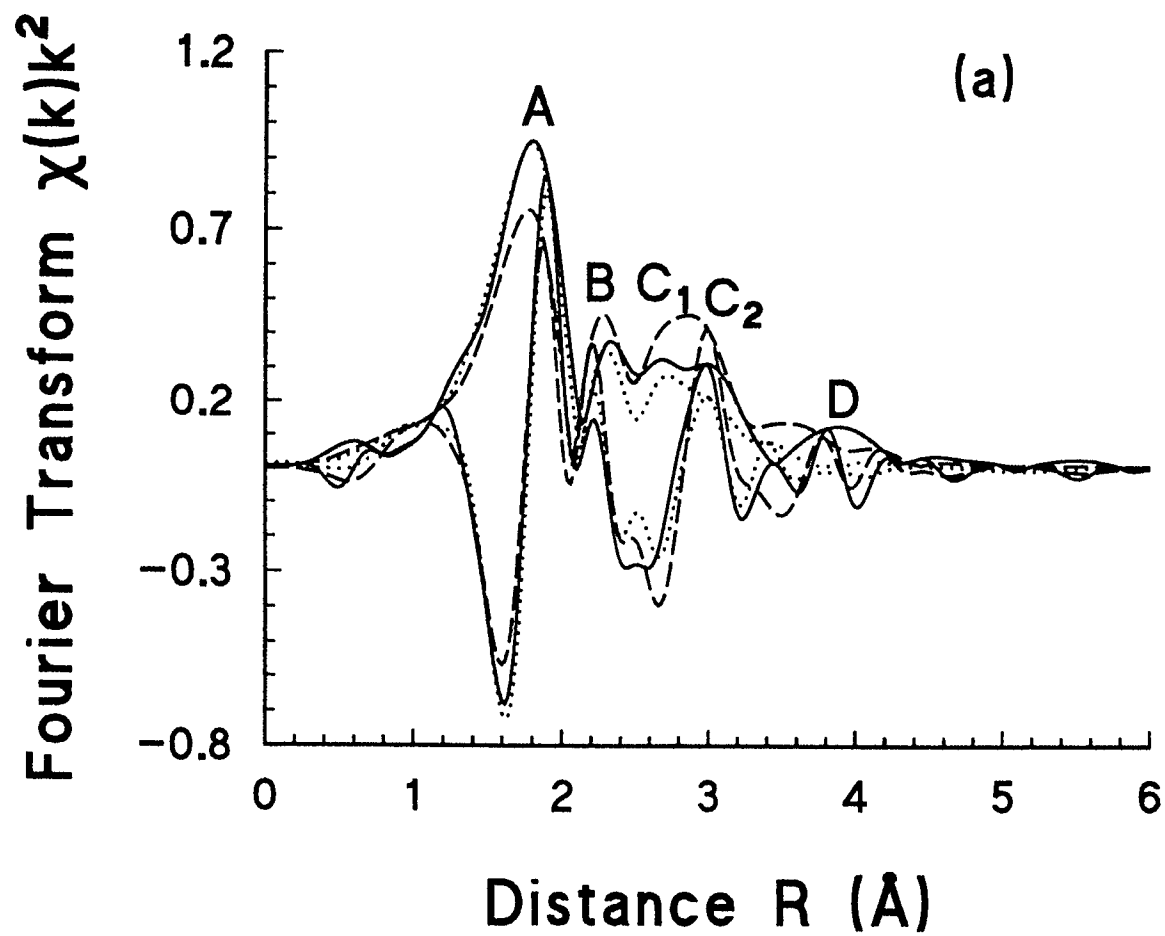

Figure S3a

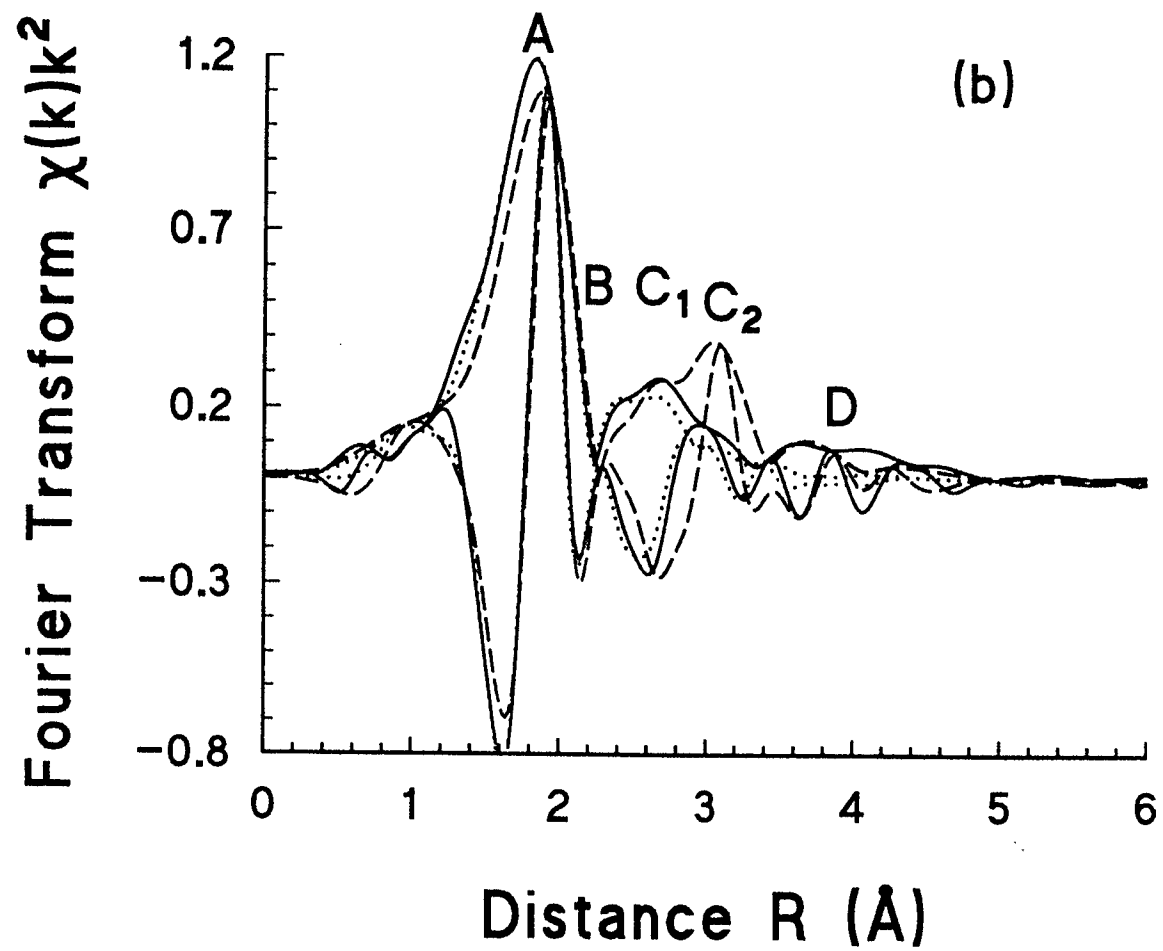

Figure S3b
